# Supplementary material
Source: PubMed Central journal article supplement (PMC5033647)
Supplement: 10-1055-s-0042-109397-sup_gf1073.pdf [file 10-1055-s-0042-109397-sup_gf1073.pdf]

# Häufigkeitsunterschiede der Periduralanästhesienutzung zwischen türkeistämmigen Migrantinnen und Nichtmigrantinnen – Erklärungsansätze und Schlussfolgerungen einer qualitativen Studie

Differences in the Frequency of Use of Epidural Analgesia between Immigrant Women of Turkish Origin and Non-Immigrant Women in Germany – Explanatory Approaches and Conclusions of a Qualitative Study

## Autoren

I. Petruschke<sup>1</sup>, B. Ramsauer<sup>2</sup>, T. Borde<sup>3</sup>, M. David<sup>4</sup>

## Institute

<sup>1</sup> Institut für Allgemeinmedizin, Universitätsklinikum Jena, Jena

<sup>2</sup> Vivantes Klinikum Neukölln, Klinik für Geburtsmedizin, Berlin

<sup>3</sup> Alice Salomon Hochschule Berlin, Berlin

<sup>4</sup> Charité-Universitätsmedizin Berlin, Campus Virchow-Klinikum, Klinik für Gynäkologie, Berlin

## Schlüsselwörter

- Geburt
- Schwangerschaft
- Entbindung
- Schmerz
- Wehen
- Geburtsschmerz

## Key words

- birth
- pregnancy
- delivery
- pain
- labour
- labour pain

## Zusammenfassung

**Einleitung:** Ausgangspunkt der hier vorliegenden Studie war die deutlich niedrigere Periduralanästhesie-(PDA-)Rate bei Schwangeren mit Migrationshintergrund (MH) Türkei im Vergleich zu Schwangeren ohne MH in der DFG-geförderten Studie „Perinatale Gesundheit und Migration in Berlin“. Es sollte geklärt werden, ob und wie sich die Einstellungen der Schwangeren bez. PDA unterscheiden.

**Methodik:** Anhand einer explorativen Studie mit leitfadengestützten Interviews wurden dazu durchschnittlich 17-minütige Interviews mit 19 türkeistämmigen und 11 deutschen Schwangeren in einem Berliner Krankenhaus geführt, die einer qualitativen Inhaltsanalyse unterzogen wurden.

**Ergebnisse:** Dem Schmerz einer vaginalen Entbindung messen Schwangere mit MH Türkei häufiger eine sinnvolle Bedeutung zu. Eine PDA wird von ihnen häufiger von vornherein abgelehnt: 1) aus Angst vor langfristigen Komplikationen wie Lähmung und Rückenschmerzen und 2) aufgrund der Ansicht, dass eine vaginale Entbindung mit PDA nicht natürlich sei. Informationen zur PDA werden häufiger aus vielfältigen, vor allem mündlichen Quellen aus dem sozialen Umfeld bezogen. Die Schwangeren beider Gruppen gaben an, die Entscheidung bez. einer PDA unabhängig von der Meinung ihres Partners zu treffen.

**Diskussion:** Die beobachteten Unterschiede in den PDA-Raten entsprechen den Einstellungen der Schwangeren. Diese beruht bei den Schwangeren mit MH Türkei gegenüber der PDA z.T. auf Fehlinformationen. Um den Schwangeren eine informierte Entscheidung zu ermöglichen, könnte die PDA während der Geburtsvorbereitung stärker thematisiert werden.

## Abstract

**Introduction:** The starting point of this study was the considerably lower rate of epidural analgesia use among women of Turkish origin in Germany compared to non-immigrant women in the German Research Foundation (DFG)-funded study entitled “Perinatal Health and Migration Berlin”. The study aimed to identify possible differences in the women’s attitudes towards epidural analgesia.

**Methods:** Exploratory study with semi-structured interviews, interviews lasting 17 minutes on average were conducted with 19 women of Turkish origin and 11 non-immigrant women at a Berlin hospital. The interviews were subjected to a qualitative content analysis.

**Results:** Immigrant women of Turkish origin in Germany more frequently ascribe meaning to the pain associated with vaginal delivery. They more frequently categorically reject the use of epidural analgesia, 1) for fear of long-term complications such as paralysis and back pain and 2) based on the view that vaginal delivery with epidural analgesia is not natural. Information on epidural analgesia is frequently obtained from a variety of sources from their social setting, in particular, by word of mouth. The women in both groups stated that they would take the decision to use epidural analgesia independent of their partner’s opinion.

**Discussion:** The differences in epidural analgesia use rates observed correspond to the women’s attitudes. For the immigrant women of Turkish origin in Germany, the attitude towards using epidural analgesia is based in part on misinformation. In order to enable the women to make an informed decision, epidural analgesia could receive a stronger focus during childbirth courses.

eingereicht 11.1.2016

revidiert 27.5.2016

akzeptiert 29.5.2016

## Bibliografie

**DOI** <http://dx.doi.org/10.1055/s-0042-109397>  
 Geburtsh Frauenheilk 2016; 76:  
 1–6 © Georg Thieme Verlag KG  
 Stuttgart · New York ·  
 ISSN 0016-5751

## Korrespondenzadresse

**Prof. Dr. med. Matthias David**  
 Charité Universitätsmedizin  
 Berlin  
 Campus Virchow-Klinikum  
 Klinik für Gynäkologie  
 Augustenburger Platz 1  
 13353 Berlin  
 matthias.david@charite.de

## Einleitung

Die Periduralanästhesie ist der Goldstandard zur Schmerzlinderung unter der Geburt. Regionalanästhesieverfahren kommen heute bei etwa 20–30% aller Geburten in Deutschland zum Einsatz [1]). In die Vermittlung zwischen Gewebeschädigung, Schmerzwahrnehmung und -äußerung sind jeweils psychische Prozesse eingeschaltet, die durch kognitive und emotionale Elemente beeinflusst werden. Biologische, soziale und kulturell-ethnische Faktoren tragen zu einer weiteren Modifikation dieser sog. Schmerzskaskade bei. Schmerzwahrnehmung und -ausdrucksverhalten variieren interkulturell [2]. Dass schwangere Immigrantinnen signifikant seltener eine PDA erhalten, wird auch aus den USA [3–5]), aus Kanada [6] und Spanien [7] berichtet. Speziell für Schwangere mit Migrationshintergrund Türkei wurde dies in Studien aus Schweden [8], Österreich [9] und Deutschland [10] gezeigt. Zu den Ursachen dieser Unterschiede gibt es verschiedene Erklärungsansätze. Eine Studie aus den USA, die der niedrigeren PDA-Rate von lateinamerikastämmigen Schwangeren (hispanic) nachging, zeigte einen Zusammenhang mit der Sprachkompetenz der Frauen [11]. Dieses Ergebnis könnte auf eine Sprachbarriere bei der Äußerung des Wunsches nach einer PDA oder auf Hindernisse bei der Informationsvermittlung bzw. Aufklärung hindeuten. Eine qualitative Untersuchung aus den USA kommt zu dem Schluss, dass der Entscheidung von lateinamerikastämmigen Schwangeren gegen eine PDA überwiegend ein falsches Verständnis der Intervention und ihrer Risiken zugrunde liegt [12]. Zusätzlich werden, neben der bereits erwähnten soziokulturell unterschiedlichen Wahrnehmung von Schmerz [13], die Einstellung des Partners [14], die Einstellung des medizinischen Personals gegenüber Schwangeren mit Migrationshintergrund bzw. Immigrantinnen [15], der Bildungsstand der Schwangeren [3, 6] und der religiöse Glaube [16] als Einflussgrößen diskutiert.

Auch in der aktuell größten deutschen Versorgungsstudie zu perinataler Gesundheit und Migration waren signifikante Unterschiede in der Anwendung einer Periduralanästhesie und CSE (combined spinal-epidural anaesthesia; im Weiteren werden beide Verfahren unter PDA zusammengefasst) zwischen Frauen mit Migrationshintergrund Türkei und Frauen ohne Migrationshintergrund aufgefallen. In der Gruppe der Frauen mit vaginaler Geburt wurde eine PDA bei 28,2% der Schwangeren mit Migrationshintergrund Türkei und bei 44,4% der Frauen ohne Migrationshintergrund angewendet ( $p < 0,001$ ) [17]. Hinweise dafür, dass Schwangere mit Migrationshintergrund Türkei in einem fortgeschrittenen Geburtsstadium in die Klinik kommen und das Zeitfenster zu klein für eine PDA ist, gibt es weder aus dem klinischen Alltag noch in der publizierten Literatur.

Mit den vorhandenen Forschungsergebnissen konnte über die Ursachen der signifikanten Unterschiede in der PDA-Rate zwischen Schwangeren mit Migrationshintergrund Türkei und ohne Migrationshintergrund nur spekuliert werden. Ziel der hier vorgestellten Studie ist es, mögliche Gründe für die unterschiedlichen PDA-Raten aufseiten der Schwangeren zu eruieren. Daraus ergeben sich folgende Forschungsfragen: Unterscheiden sich Schwangere mit Migrationshintergrund Türkei in ihren Einstellungen gegenüber der PDA von Schwangeren ohne Migrationshintergrund? Welche Faktoren beeinflussen die Einstellungen gegenüber einer PDA sub partu?

## Methodik

Da quantitative Studien bisher keine Antwort auf diese Frage lieferten, wurde eine explorativ-qualitative Herangehensweise gewählt, die es ermöglicht, Einstellungen und deren Begründungszusammenhänge zu eruieren.

### Ein- und Ausschlusskriterien

Eingeschlossen wurden alle volljährigen Schwangeren, die sich in der geburtshilflichen Ambulanz, in der Hebammensprechstunde, im Aufnahmebereich des Kreißsaals und auf einer geburtshilflichen Station zu einem Interview bereit erklärten. Ausgeschlossen wurden Schwangere, die sich in einem fortgeschrittenen Stadium der Geburt oder die sich nach Einschätzung des Personals in einer körperlich oder psychisch schwierigen Situation befanden.

### Interviews

Es sollte eruiert werden, ob den beobachteten unterschiedlichen PDA-Raten der Schwangeren mit Migrationshintergrund Türkei und der Schwangeren ohne Migrationshintergrund unterschiedliche Einstellungen zugrunde liegen. Dazu wurden Schwangere nach schriftlichem Einverständnis in einem Berliner Krankenhaus interviewt. Die Interviews wurden als fokussierte (Leitfaden-)Interviews konzipiert, in einem Pretest überprüft und anschließend leicht modifiziert [18]. Zusätzlich wurden Angaben zur Schwangerschaft, zum soziodemografischen und Migrationshintergrund in einem Kurzfragebogen erfasst. In den Interviews wurden die Schwangeren gebeten, ihre Einstellungen zur geburtshilflichen Intervention PDA auszuführen. Dabei wurde nicht nur nach der Einstellung (Zustimmung/Ablehnung) gefragt, sondern auch nach den Begründungszusammenhängen dafür. Alle verwendeten Dokumente wurden von geprüften Übersetzern ins Türkische übersetzt. Bei Bedarf wurde eine Dolmetscherin eingesetzt, die das Interview simultan übersetzte. Die Interviews wurden auf ein Diktiergerät aufgenommen. Die Feldnotizen zum Gesprächskontext (Setting, Kurzbeschreibung der Interviewpartnerin, Rapport, Höhepunkte, schwierige Momente, Überraschungen) wurden in kondensierter Form angefertigt. Alle Interviews wurden durch eine Person (I.P.) geführt. Nach der Übertragung der Audiodatei vom Diktiergerät in ein digitales Textdokument wurde diese vom Aufnahmegerät gelöscht. Es erfolgte die Pseudonymisierung. Die Transkription der Interviews folgte den Empfehlungen von Kuckartz et al. (2008) [19], die qualitative Inhaltsanalyse dem Konzept nach Mayring (2002) [20]. Die Kategorienbildung erfolgte induktiv, d. h. am Material geleitet durch die Durchführende der Studie (I.P.). Innerhalb der Gruppe der Schwangeren mit Migrationshintergrund Türkei wurde an geeigneten Stellen weiterführend verglichen hinsichtlich Einwanderungsgeneration (erste vs. zweite/dritte), Bildungsstand (kein Abschluss, nur Grundschule vs. Realschule, Abitur, Studium) und Parität (Erstgebärende vs. alle anderen). Da es eine hohe Korrelation zwischen der Einwanderungsgeneration und den Deutschkenntnissen gab, wurden zwischen den Frauen mit verschiedenen gut ausgeprägten Deutschkenntnissen keine Vergleiche angestellt.

Die Interviews wurden an 12 Tagen von Juni bis August 2015 geführt. Von den Schwangeren mit Migrationshintergrund Türkei wurden 9 gemeinsam mit einer Dolmetscherin interviewt, da sie ein Interview in türkischer Sprache bevorzugten. Es wurde darauf geachtet, dass die Interviews weder die Wartezeit verlängerten noch geplante Untersuchungen oder Arztgespräche verzögerten. Die Auswahl der befragten Frauen erfolgte zufällig.

**Tab. 1** Soziodemografische Angaben der befragten Schwangeren (n = 30).

|                                        | alle (n = 30) | Migrationshintergrund<br>Türkei (n = 19) | kein Migrations-<br>hintergrund (n = 11) |
|----------------------------------------|---------------|------------------------------------------|------------------------------------------|
| Alter (Jahre)                          |               |                                          |                                          |
| ▶ Median (Range)                       | 29 (21–41)    | 29 (21–41)                               | 29 (25–37)                               |
| Gestationsalter (Wochen)               |               |                                          |                                          |
| ▶ Mittelwert (Range)                   | 34,7 (25–41)  | 34,1 (25–41)                             | 35,8 (30–40)                             |
| Parität                                |               |                                          |                                          |
| ▶ Erstgebärende, % (n)                 | 33,2 (9)      | 42 (8)                                   | 9,1 (1)                                  |
| ▶ Zweit-/Mehrggebärende, % (n)         | 66,8 (21)     | 58,0 (11)                                | 90,9 (10)                                |
| Schulabschluss                         |               |                                          |                                          |
| ▶ kein/Grundschule, % (n)              | 20 (6)        | 31,6 (6)                                 | 0                                        |
| ▶ Hauptschule, % (n)                   | 6,7 (2)       | 10,5 (2)                                 | 0                                        |
| ▶ Realschule, % (n)                    | 30 (9)        | 26,3 (5)                                 | 36,4 (4)                                 |
| ▶ Abitur/Studium, % (n)                | 43,3 (13)     | 31,6 (6)                                 | 63,7 (7)                                 |
| Deutschkenntnisse (Selbsteinschätzung) |               |                                          |                                          |
| ▶ sehr gut, % (n)                      |               | 52,6 (10)                                |                                          |
| ▶ gut, % (n)                           |               | 15,8 (3)                                 |                                          |
| ▶ mittelmäßig, % (n)                   |               | 5,3 (1)                                  |                                          |
| ▶ gering, % (n)                        |               | 26,3 (5)                                 |                                          |
| wohnhaf in Deutschland                 |               |                                          |                                          |
| ▶ seit Geburt, % (n)                   |               | 52,6 (10)                                |                                          |
| ▶ 5–15 Jahre, % (n)                    |               | 55,6 (5)                                 |                                          |
| ▶ < 5 Jahre, % (n)                     |               | 44,4 (4)                                 |                                          |
| Partner                                |               |                                          |                                          |
| ▶ ja, % (n)                            | 93,3 (28)     | 100 (19)                                 | 81,8 (9)                                 |
| ▶ nein/alleinstehend, % (n)            | 6,7 (2)       | 0                                        | 18,2 (2)                                 |
| Religion                               |               |                                          |                                          |
| ▶ keine, % (n)                         | 26,6 (8)      | 5,3 (1)                                  | 63,6 (7)                                 |
| ▶ muslimisch, % (n)                    | 60 (18)       | 94,7 (18)                                | 0                                        |
| ▶ christlich, % (n)                    | 13,3 (4)      | 0                                        | 36,4 (4)                                 |

Nur ein Viertel der angesprochenen Schwangeren war nicht zu einem Interview bereit.

Bei der Planung der Studie wurde angenommen, dass etwa 50 Interviews pro Gruppe nötig sein würden, um genügend Informationen zu erhalten. Bei den Schwangeren ohne Migrationshintergrund stellte sich jedoch eine inhaltliche „Sättigung“ bereits nach 10 Interviews ein, sodass diese nach dem 11. Interview beendet wurden. Bei den Interviews mit den türkeistämmigen Schwangeren wurde nach 19 Interviews eine inhaltliche „Sättigung“ erreicht.

Die Interviews mit den türkeistämmigen Schwangeren dauerten durch die teilweise notwendige Übersetzung länger als die Interviews mit den Schwangeren ohne Migrationshintergrund (durchschnittlich 21 resp. 13 min).

### Statistik und Ethikvotum

Die deskriptive statistische Analyse des Kurzfragebogens erfolgte mithilfe des Statistikprogramms SPSS (Version 23.0, IBM). Es liegt ein positives Ethikvotum für das Gesamtprojekt, die DFG-geförderte Studie „Perinatale Gesundheit und Migration in Berlin“ (FKZ EA1/235/08), vor. Das hier vorgestellte Vorhaben wurde durch die Datenschutzbeauftragte der Charité separat genehmigt.

### Ergebnisse

▼  
Insgesamt lagen nach den Interviews 552 Minuten Audiomaterial vor; die Transkription beanspruchte insgesamt ca. 64 Stunden. Interviewpartnerinnen waren 30 schwangere Frauen, davon 19 mit Migrationshintergrund Türkei und elf ohne Migrationshin-

tergrund, die soziodemografischen Angaben sind in **Tab. 1** aufgeführt.

In die inhaltliche Analyse flossen 18 Interviews der Schwangeren mit Migrationshintergrund Türkei und 10 Interviews der Schwangeren ohne Migrationshintergrund ein.

In dem Kurzfragebogen wurde nach den für die Schwangere wichtigsten Personen bei Fragen zu Schwangerschaft und Geburt gefragt. Das war für die Schwangeren mit MH Türkei an erste Stelle der Frauenarzt, gefolgt von der Hebamme und der Mutter. Für die Schwangeren ohne MH waren die wichtigsten Personen der Frauenarzt, die Hebamme und der Partner.

Im Folgenden werden die Ergebnisse der Interviews bez. Geburtsschmerz (Gefühle und Bedeutung), Einstellungen und Informationsquellen zur PDA und der Rolle des Partners dargestellt.

### Geburtsschmerz

Gefühle, die beim Gedanken an den Geburtsschmerz aufkamen und benannt wurden, waren a) Angst, b) Angst gemischt mit Zuvorsicht, c) Gelassenheit und d) andere (z. B. Unsicherheit). Diese Nennungen waren in den beiden Vergleichsgruppen gleich verteilt. Darüber hinaus wurden die Schwangeren gefragt „Denken Sie, dass die Geburtsschmerzen einen Sinn haben?“ Schwangere ohne Migrationshintergrund erklärten häufiger, darin keinen Sinn zu sehen (5 von 9 vs. 1 von 12). Sie waren jedoch oft der Ansicht, „dass es ohne Schmerz nicht geht“ bzw. der Schmerz als „notwendiges Übel“ zur Entbindung gehöre. Schwangere mit Migrationshintergrund Türkei maßen den Schmerzen häufiger eine Bedeutung zu bzw. hatten Erklärungsmodelle dafür (11 von 12), wie z. B. die (Ab-)Trennung des Kindes: „Ja, es ist natürlich, dass es so ist, weil ein Kind löst sich aus der Frau heraus. Deswegen muss

Tab. 2 Zusammenfassende Übersicht zu den Interviewaussagen.

| Migrationshintergrund Türkei                                                                                                                                                                                                                                                                                                                                                                                                                                                             | kein Migrationshintergrund                                                       |
|------------------------------------------------------------------------------------------------------------------------------------------------------------------------------------------------------------------------------------------------------------------------------------------------------------------------------------------------------------------------------------------------------------------------------------------------------------------------------------------|----------------------------------------------------------------------------------|
| <b>Gemeinsamkeiten</b>                                                                                                                                                                                                                                                                                                                                                                                                                                                                   |                                                                                  |
| <ul style="list-style-type: none"> <li>Die Gefühle beim Gedanken an die Schmerzen der Entbindung unterscheiden sich nicht zwischen den Gruppen.</li> <li>Für die Schwangeren beider Gruppen sind Internet/Bücher sowie die ggf. vorhandene Erfahrung einer Entbindung gleichermaßen Informationsquellen über die PDA.</li> <li>Die Mehrheit aller Schwangeren trifft die Entscheidung für oder gegen eine PDA überwiegend unabhängig von der Einstellung ihres Partners dazu.</li> </ul> |                                                                                  |
| <b>Unterschiede</b>                                                                                                                                                                                                                                                                                                                                                                                                                                                                      |                                                                                  |
| Bedeutung des Geburtsschmerzes                                                                                                                                                                                                                                                                                                                                                                                                                                                           |                                                                                  |
| Dem Geburtsschmerz wird häufiger eine Bedeutung beigemessen.                                                                                                                                                                                                                                                                                                                                                                                                                             | Dem Geburtsschmerz wird keine Bedeutung zugeschrieben.                           |
| Einstellungen zur PDA                                                                                                                                                                                                                                                                                                                                                                                                                                                                    |                                                                                  |
| Die PDA wird häufiger von vornherein abgelehnt.                                                                                                                                                                                                                                                                                                                                                                                                                                          | Häufigere Zustimmung zur PDA von vornherein.                                     |
| Gründe für die Ablehnung einer PDA                                                                                                                                                                                                                                                                                                                                                                                                                                                       |                                                                                  |
| <ul style="list-style-type: none"> <li>Es bestehen häufiger Bedenken bez. der Durchführung und der Komplikationen (Lähmung, Rückenschmerzen).</li> <li>Mit einer PDA ist eine vaginale Entbindung für ein Drittel der Schwangeren keine natürliche Entbindung mehr.</li> </ul>                                                                                                                                                                                                           | Mehr als die Hälfte der Schwangeren verspricht sich Erleichterung durch die PDA. |
| Informationsquellen zur PDA                                                                                                                                                                                                                                                                                                                                                                                                                                                              |                                                                                  |
| Informationen zur PDA werden häufiger aus dem sozialen Umfeld bezogen.                                                                                                                                                                                                                                                                                                                                                                                                                   | Arzt, Vorbereitungskurs u. a. sind häufiger Informationsquellen.                 |

es ja (...) mit Schmerz verbunden sein. Also, ein Teil aus dem Körper trennt sich.“ (Int. 28, MH Türkei) und „Wehen als Signal“. Es gab diesbez. keine Unterschiede zwischen den Einwanderungsgenerationen.

### Einstellungen zur PDA

Die Antworten auf die Frage „Wie stehen Sie zur PDA?“ ließen sich in a) Zustimmung, b) Zustimmung bei Bedarf – darunter wurde sowohl der Bedarf aus Sicht des Personals als auch der Bedarf vonseiten der Schwangeren verstanden – und c) Ablehnung kategorisieren. Es zeigte sich ein deutlicher Unterschied in der von vornherein bestehenden Akzeptanz der PDA. Schwangere ohne MH waren der PDA deutlich positiver gegenüber eingestellt, was sich in folgendem Zitat widerspiegelt: „Also ganz ehrlich, wenn man sowas haben kann, warum sollte man das nicht nutzen.“ (Int. 22, kein MH) Türkeistämmige Schwangere äußerten häufiger Ablehnung: „Also, auch wenn es unerträglich wäre, ich würde die Spritze nicht nehmen.“ (Int. 27, MH Türkei) Dieses Ergebnis bei den Schwangeren mit MH Türkei änderte sich auch unter Berücksichtigung der Parität nicht, d. h. Frauen, die schon einmal entbunden hatten, lehnten die PDA ebenso häufig ab wie Frauen, die erstmals schwanger waren (4 von 9 vs. 3 von 8). Es zeigte sich jedoch ein Unterschied zwischen den Einwanderergenerationen. Schwangere der 1. Generation lehnten die PDA häufiger grundsätzlich ab (6 von 8 vs. 1 von 9) während Schwangere der 2. Generation häufiger eine PDA in Erwägung zogen („bei Bedarf“) (6 von 9 vs. 0 von 8).

Die Schwangeren mit Migrationshintergrund Türkei begründeten ihre (negativen) Einstellungen häufig mit Bedenken bez. der Anlage der PDA (4 von 16 vs. 1 von 9) und bez. der Komplikationen (8 von 16 vs. 1 von 9): „Ich habe davor Angst, weil ich Freundinnen habe, die dadurch Schmerzen im Rücken seitdem haben, seit der PDA.“ (Int. 29, MH Türkei). Diese Bedenken bestehen bei Frauen mit niedrigeren (kein Abschluss, Grundschule) genauso wie bei Frauen mit höheren Bildungsabschlüssen (Realschule, Abitur, Studium) (3 von 6 vs. 5 von 10). Befürchtungen hinsichtlich der Risiken einer PDA wurden bei einer Schwangeren auch durch die Aufklärung selbst, den Umfang des Aufklärungsbogens und die zu leistende Unterschrift geweckt: „Aber dann frag ich mich, warum man dann unter der Geburt unterschreiben muss. [...] Drei

vier Seiten, soweit ich weiß. Andere Schmerzmittel unterschreibt man ja nicht, was Lachgas angeht oder so.“ (Int. 17, MH Türkei) Die Meinung, dass eine vaginale Entbindung mit PDA keine natürliche Geburt mehr sei, wurde nur von Schwangeren mit Migrationshintergrund Türkei geäußert (5 von 16 vs. 0 von 9): „Natürliche Geburt heißt halt ohne PDA für mich.“ (Int. 17, MH Türkei)

### Informationsquellen zur PDA

Bücher/Internet und eine vorige Entbindung wurden von den Schwangerengruppen gleich häufig als Informationsquellen zur PDA angegeben. Jedoch zeigten sich auch Unterschiede: Schwangere mit Migrationshintergrund Türkei bezogen ihre Informationen über die PDA häufiger aus ihrem sozialen Umfeld (5 von 14 vs. 0 von 7) und von Freunden und Familie (4 von 14 vs. 0 von 7): „Bei uns im Kreis heißt es dann, man hat dann später Rückenschmerzen oder bleibende Schäden oder [...] man hat ja Risiko, dass man [...] gelähmt wird ...“ (Int. 13, MH Türkei). Dies trifft in der Gruppe der türkeistämmigen Schwangeren besonders zu für Erstgebärende im Vergleich zu Schwangeren, die schon mindestens einmal schwanger waren (6 von 6 vs. 3 von 8). Erwartungsgemäß bezogen letztere Informationen zur PDA auch häufiger durch eine vorige Schwangerschaft. Schwangere ohne Migrationshintergrund nutzten zusätzlich häufiger andere Quellen zur Information über die PDA: Frauenarzt, Geburtsvorbereitungskurs, berufsbedingt medizinisches Umfeld, Fernsehen (6 von 7 vs. 2 von 14).

### Rolle des Partners

Es wurde gefragt, welche Einstellung der Partner zur PDA habe und welche Rolle seine Meinung bei der Entscheidung für oder gegen eine PDA spielt. Die Mehrheit beider Frauengruppen gab an, diese Entscheidung selbst zu treffen, wie sich in folgenden Zitaten widerspiegelt: „Er respektiert meine Entscheidung. Er sagt, er passt sich an.“ (Int. 6, MH Türkei) und „Er unterstützt mich bei dem, wie ich mich entscheide, hätte auch wenig Chance dagegen.“ (Int. 16, kein MH)

Die **Tab. 2** fasst die Einstellungen und Meinungen der Schwangeren zusammen und stellt Unterschiede und Gemeinsamkeiten der beiden Befragungsgruppen gegenüber.

## Diskussion

Prinzipiell sollten allen Schwangeren unter der Geburt alle Möglichkeiten der Schmerzbeikämpfung nach informierter Aufklärung offen stehen. Versorgungsunterschiede sollten weder seitens der Krankenhausträger noch nach dem sozialen oder Versicherungsstatus bestehen. Bei ausreichenden Möglichkeiten einer schmerzfreien Geburt stellt sich die Frage, aus welchem Grund Schwangere dieses Angebot in Anspruch nehmen, während andere eine Geburt unter Tolerierung des Geburtsschmerzes bevorzugen. Die vorliegende interviewbasierte, qualitativ ausgerichtete Studie will Faktoren identifizieren, die für die betroffenen Frauen Anlass sind, einer PDA zuzustimmen oder diese abzulehnen. Eine qualitative Studie eignet sich dafür in besonderer Weise.

In ihren Einstellungen zur PDA unterschieden sich die befragten Schwangerengruppen deutlich. Im Gegensatz zu Schwangeren ohne Migrationshintergrund lehnte der überwiegende Teil der Schwangeren mit Migrationshintergrund Türkei eine PDA von vornherein ab, wobei 3 Hauptgründe deutlich wurden:

1. Bedenken bez. der unmittelbaren Anlage einer PDA,
2. Bedenken bez. späterer Komplikationen (Rückenschmerzen, Lähmung) und
3. der Wunsch nach einer natürlichen Geburt.

Identische Bedenken wurden überwiegend von lateinamerikastämmigen Frauen (hispanic) in einer Studie aus den USA geäußert [12]. Angst vor Beeinträchtigung der eigenen Gesundheit war für 54% von ebenfalls in den USA befragten Schwangeren der Grund, eine PDA abzulehnen. Lateinamerikastämmige Frauen stellten in dieser Population die größte Gruppe ethnischer Minderheiten dar und erhielten überdurchschnittlich häufig keine PDA [14].

Der Wunsch, eine natürliche Geburt („unmedicated birth“) erfahren zu wollen und aus diesem Grund eine PDA abzulehnen, ist auch aus anderen Studien bekannt [14,21,22]. Die befragten Schwangeren mit Migrationshintergrund Türkei informierten sich zur PDA häufiger im sozialen Umfeld (Verwandte, Nachbarn, Freunde, Bekannte) als Schwangere ohne Migrationshintergrund. Das vorhandene Wissen über eine PDA wurde zwar nicht erfragt. Äußerungen wie „das hab ich so gehört“ oder „das sagt man so“ lassen – ähnlich wie in einer Studie aus den USA – vermuten, dass die Ablehnung der PDA keine informierte Entscheidung ist und möglicherweise auf Missverständnissen beruht [12]. In einer weiteren Studie aus den USA wurde ein ähnlich breit gefächertes Spektrum an Informationsquellen über die PDA beschrieben. Ein Zusammenhang zwischen der Informationsquelle und der tatsächlichen Durchführung einer PDA bestand allerdings nicht [14].

## Stärken der Studie

1. Diese Arbeit liefert Erklärungsansätze für die niedrigere PDA-Rate bei Schwangeren mit Migrationshintergrund Türkei im Vergleich zu Schwangeren ohne Migrationshintergrund, wie sie sowohl in einer Auswertung von Daten aus den 1990er-Jahren [23] als auch aktuell [17] in Berlin dokumentiert wurden. Wahrscheinlich sind die Ergebnisse auch auf türkeistämmige Schwangere in Österreich zu übertragen, wo ebenfalls eine niedrigere PDA-Rate beobachtet wurden [9].
2. Durch die explorativ-qualitative Methodik war es möglich, Unterschiede in den Einstellungen der Schwangerengruppen herauszuarbeiten.

3. Der Einsatz einer Übersetzerin ermöglichte es, die Ansichten Schwangerer mit geringeren Deutschkenntnissen aufzunehmen und auszuwerten.
4. Die Studie wurde mit einer Methode, an einem Standort und durch eine Interviewerin durchgeführt. Ein Interobserver-Bias entfällt damit.

## Limitationen

In dieser Arbeit wurde nur die Seite der Schwangeren betrachtet. Andere mögliche Ursachen wie bspw. die Einstellung des geburtshilflichen Personals gegenüber den beiden Schwangerengruppen bzw. gegenüber der Intervention wurden nicht beleuchtet.

## Schlussfolgerungen

1. Aus den Ergebnissen dieser Studie kann abgeleitet werden, dass den Einstellungen zur PDA bei Schwangeren mit Migrationshintergrund Türkei Fehlinformationen und Ängste bez. der Komplikationen zugrunde liegen. Da Frauenarzt und Hebamme zu den wichtigsten Ansprechpartnern für türkeistämmige Schwangere gehören, könnten beide Berufsgruppen anstreben, schon während der Schwangerschaft die bestehenden Ängste vor langfristigen Komplikationen einer PDA zu reduzieren. Für Schwangere mit dafür nicht ausreichenden Deutschkenntnissen wären Printmedien auf Türkisch sinnvoll. Für Analphabetinnen wäre ein professioneller Dolmetscher für die medizinische Betreuung während der Schwangerschaft wünschenswert bzw. die Versorgung durch deutsch- und türkischsprachige Ärzte und Hebammen. Eine informierte Entscheidung kann auch gegen eine PDA ausfallen, z.B. aus dem Wunsch heraus, eine möglichst unbeeinflusste Geburt („unmedicated birth“) erfahren zu wollen. Diese Entscheidung sollte unabhängig vom Migrationshintergrund der Schwangeren akzeptiert werden.
2. Für die Schwangeren ohne Migrationshintergrund kann aufgrund der Studienergebnisse festgestellt werden, dass die höhere PDA-Rate deren Einstellungen und Wünschen entspricht.

## Interessenkonflikt

Kein Interessenkonflikt angegeben.

## Literatur

- 1 Hunsicker A, Schmidt J, Birkholz T. Anästhesie in der Geburtshilfe. Eine Kurzübersicht. *Kliniker* 2012; 41: 184–190
- 2 Bates MS, Edwards WT, Anderson KO. Ethnocultural influences on variation in chronic pain perception. *Pain* 1993; 52: 101–112
- 3 Glance LG, Wissler R, Glantz C et al. Racial differences in the use of epidural analgesia for labor. *Anesthesiology* 2007; 106: 19–25
- 4 Rust G, Nembhard WN, Nichols M et al. Racial and ethnic disparities in the provision of epidural analgesia to Georgia Medicaid beneficiaries during labor and delivery. *Am J Obstet Gynecol* 2004; 191: 456–462
- 5 Toledo P, Sun J, Grobman WA et al. Racial and ethnic disparities in neuraxial labor analgesia. *Anesth Analg* 2012; 114: 172–178
- 6 Liu N, Wen SW, Manual DG et al. Social disparity and the use of intrapartum epidural analgesia in a publicly funded health care system. *Am J Obstet Gynecol* 2010; 202: 273.e1–273.e8
- 7 Jiménez-Puente A, Benítez-Parejo N, Del Diego-Salas J et al. Ethnic differences in the use of intrapartum epidural analgesia. *BMC Health Serv Res* 2012; 12: 207
- 8 Ekéus C, Cnattingius S, Hjern A. Epidural analgesia during labor among immigrant women in Sweden. *Acta Obstet Gynecol Scand* 2010; 89: 243–249

- 9 Oberaigner W, Leitner H, Oberaigner K et al. Migrants and obstetrics in Austria—applying a new questionnaire shows differences in obstetric care and outcome. *Wien Klin Wochenschr* 2013; 125: 34–40
- 10 David M, Pachaly J, Vetter K. Perinatal outcome in Berlin (Germany) among immigrants from Turkey. *Arch Gynecol Obstet* 2006; 274: 271–278
- 11 Caballero JA, Butwick AJ, Carvalho B et al. Preferred spoken language mediates differences in neuraxial labor analgesia utilization among racial and ethnic groups. *Int J Obstet Anesth* 2014; 23: 161–167
- 12 Toledo P, Sun J, Peralta F et al. A qualitative analysis of parturients' perspectives on neuraxial labor analgesia. *Int J Obstet Anesth* 2013; 22: 119–123
- 13 Callister LC, Khalaf I, Semenic S et al. The pain of childbirth: perceptions of culturally diverse women. *Pain Manag Nur* 2003; 4: 145–154
- 14 Harkins J, Carvalho B, Evers A et al. Survey of the factors associated with a woman's choice to have an epidural for labor analgesia. *Anesth Res Pract* 2010; DOI: 10.1155/2010/356789
- 15 Puthussery S, Twamley K, Harding S et al. 'They're more like ordinary stropky British women': attitudes and expectations of maternity care professionals to UK-born ethnicity minority women. *J Health Serv Res Pol* 2008; 13: 195–201
- 16 Sheiner E, Sheiner EK, Shoham-Vardi I et al. Predictors of recommendation and acceptance of intrapartum epidural analgesia. *Anesth Analg* 2000; 90: 109–113
- 17 David M, Borde T, Brenne S et al. Comparison of perinatal data of immigrant women of Turkish origin and German women – results of a prospective study in Berlin. *Geburtsh Frauenheilk* 2014; 74: 441–448
- 18 Petruschke I. Einstellungen gegenüber Kaiserschnitt und Periduralanästhesie. Eine qualitative Befragung schwangerer Frauen mit und ohne Migrationshintergrund Türkei. Masterarbeit zur Erlangung des Grades „Master of Public Health (MPH)“. Berlin: Charité – Universitätsmedizin Berlin, School of Public Health; 2015 (eingereicht)
- 19 Kuckartz U, Dresing T, Rädicker S et al. *Qualitative Evaluation: Der Einstieg in die Praxis*. Wiesbaden: Verlag für Sozialwissenschaften; 2008
- 20 Mayring P. *Einführung in die qualitative Sozialforschung. Eine Anleitung zu qualitativem Denken*. 5 Aufl. Wiesbaden: Beltz Studium; 2002
- 21 Arcia A. US nulliparas' perceptions of roles and of the birth experience as predictors of their delivery preferences. *Midwifery* 2013; 29: 885–894
- 22 Gamble JA, Creedy DK. Women's preference for a cesarean section: incidence and associated factors. *Birth* 2001; 28: 101–110
- 23 David M, Pachaly J, Vetter K. Perinatal outcome in Berlin (Germany) among immigrants from Turkey. *Arch Gynecol Obstet* 2006; 274: 271–278
